# Supplementary material
Source: PubMed Central journal article supplement (PMC7114565)

# Supplemental FIG S1. Alisporivir inhibits the production of infectious MERS-CoV progeny

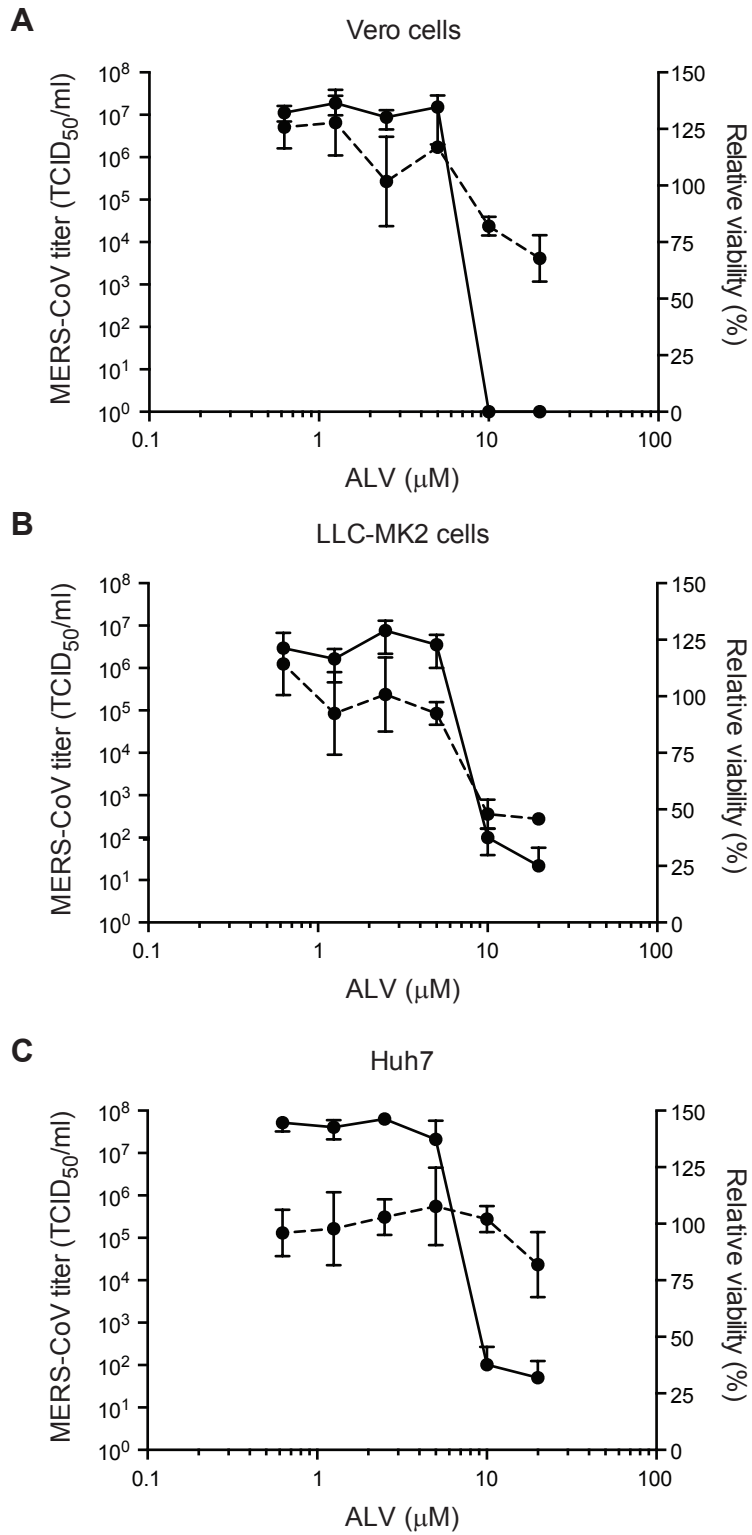

Supplement: mmc1.pdf [file mmc1.pdf]
